# Supplementary material for: Single-nucleus multi-omics identifies shared and distinct pathways in Pick’s and Alzheimer’s disease
Source: PubMed Central journal article supplement — bioRxiv. 2024 Sep 8:2024.09.06.611761. Preprint. [Version 1] doi: 10.1101/2024.09.06.611761 (PMC11398495; doi:10.1101/2024.09.06.611761), 2024-09-08
Supplement: media-1.pdf [file media-1.pdf]

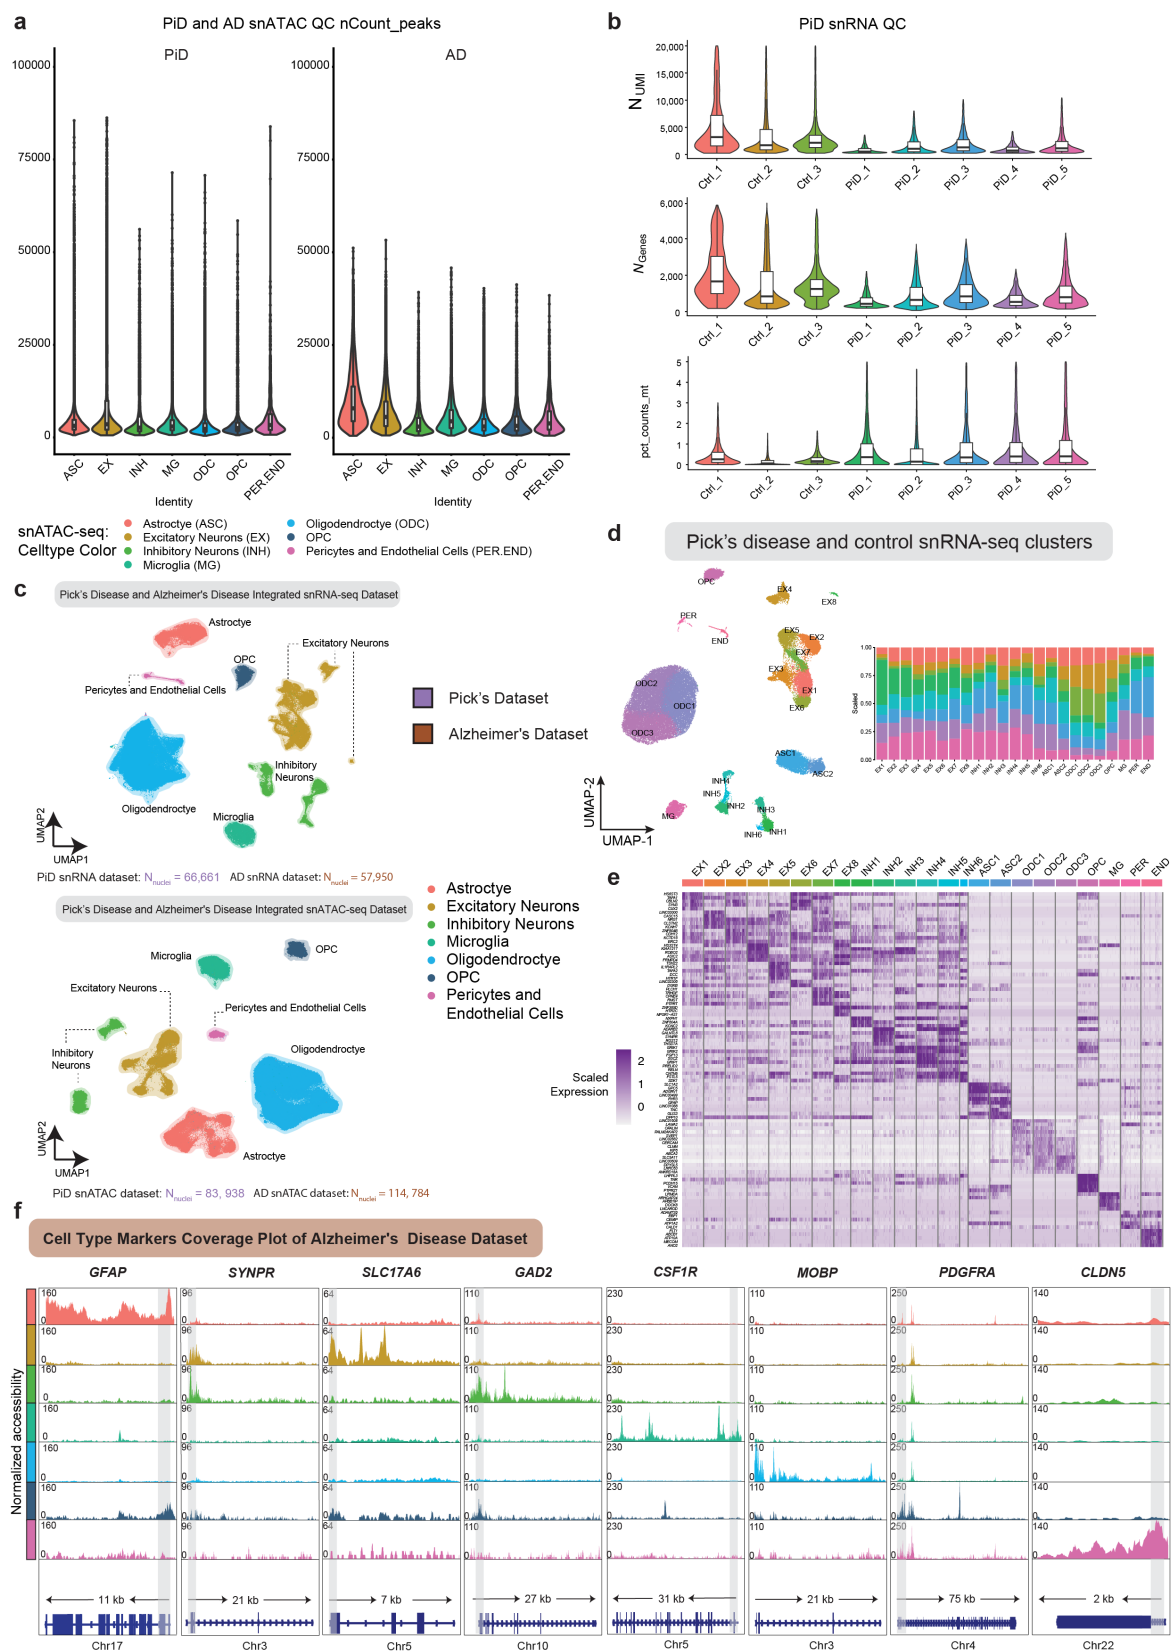

**Figure S1. Quality control and Cell type annotations of the PiD and AD snATAC-seq datasets.** **a**, Violin plot showing the number of the peak counts in the cell type clusters from the PiD and AD human PFC snATAC-seq dataset. **b**, Violin plot showing the number of UMI, genes and mitochondrial percentage in the samples from the PiD snRNA-seq dataset. **c**, Integrated Uniform Manifold Approximation and Projection (UMAP) visualizations for diagnosis for snRNA-seq and snATAC-seq data from PiD and AD. **d**, Uniform Manifold Approximation and Projection (UMAP) visualizations for clusters of snRNA-seq data from PiD. **e**, Heatmap of canonical cell-type markers for snRNA-seq data from PiD. **f**, Coverage plots for canonical cell-type markers in AD dataset: GFAP (chr17:44905000-44916000) for astrocytes, SYNPR (chr3:63278010-63278510) for neurons, SLC17A6 (chr11:22338004-22345067) for excitatory neurons, GAD2 (chr10:26214210-26241766) for inhibitory neurons, CSF1R (chr5:150056500-150087500) for microglia, MOBP (chr3:39467000-39488000) for oligodendrocytes, PDGFRA (chr4:54224871-54300000) for Pericytes and Endothelial Cells in PiD dataset. The grey bar within each box highlights the promoter regions.

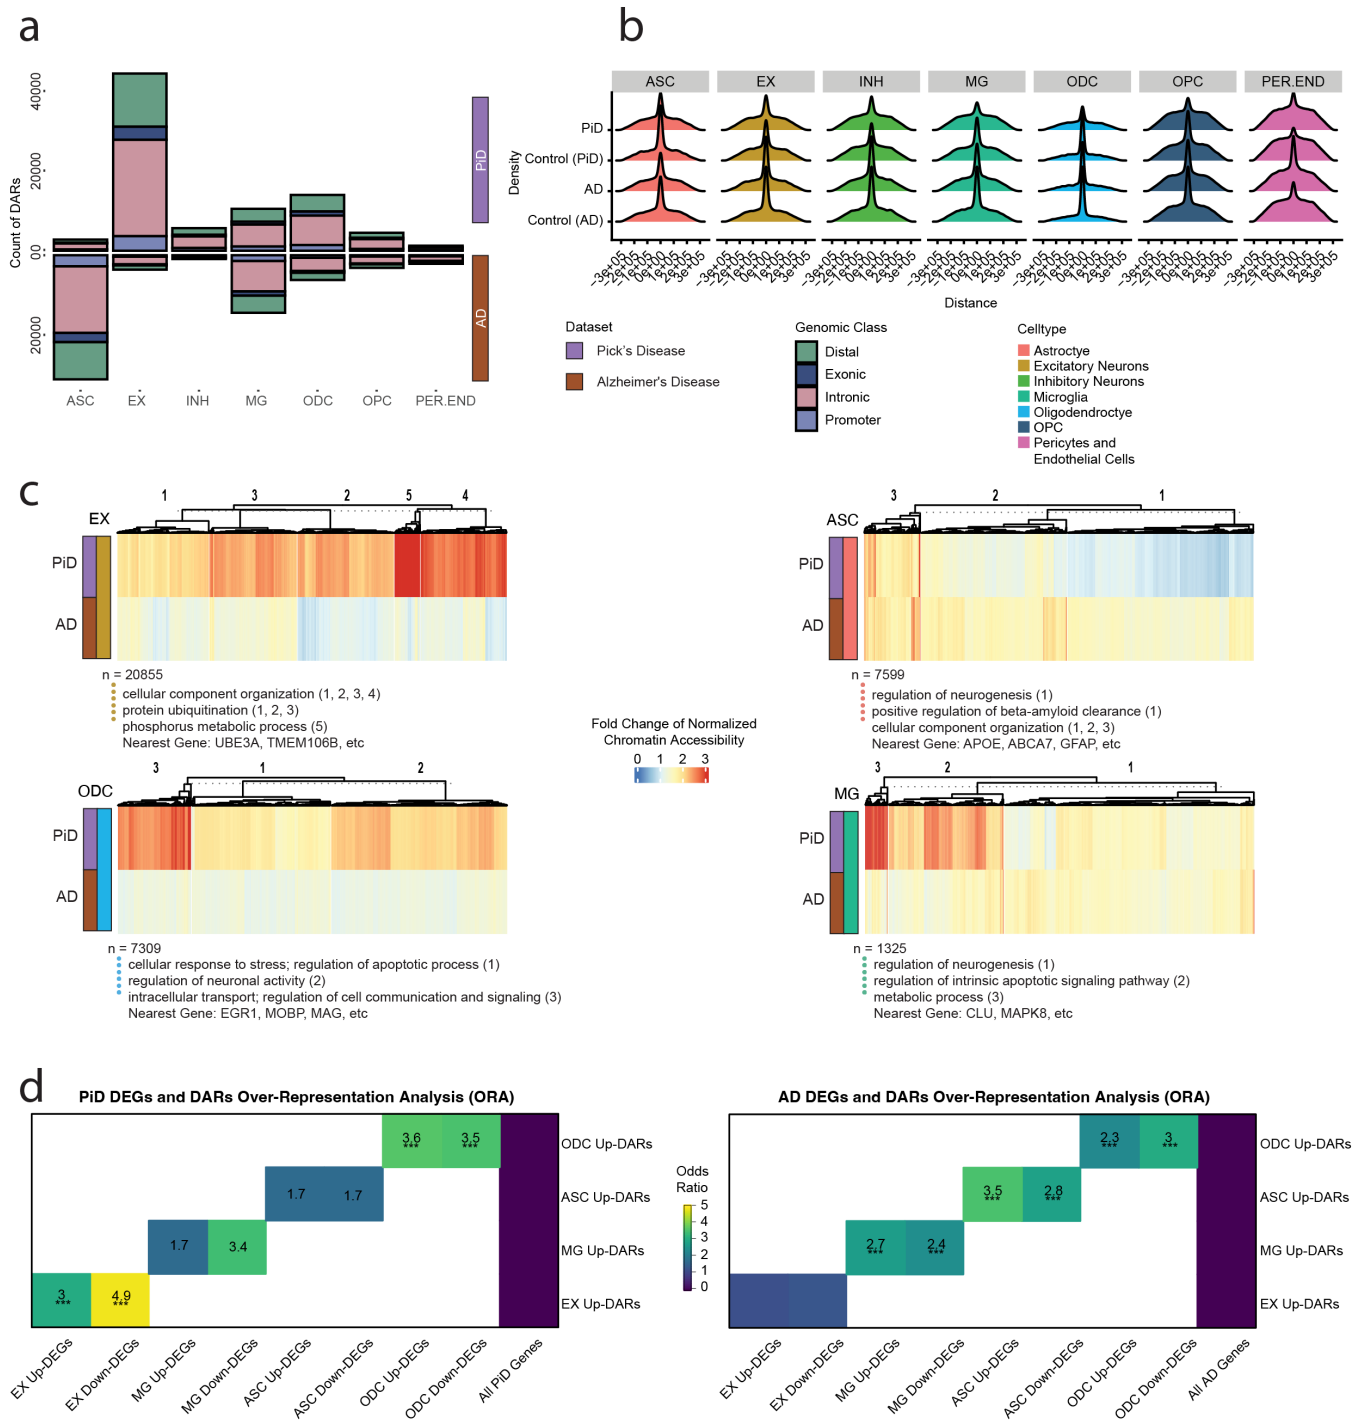

**Figure S2. Different accessible CREs by cell types.** **a**, Genomic type classification of differential open accessible regions group by cell types ( $P$ -value  $< 0.05$ ) between PiD, AD with their respective controls. **b**, Ridgeline plot showing the distance of imputed enhancers from the promoters. **c**, Heatmaps of fold changes (Disease vs. Control) on normalized chromatin accessibility of differential accessible intronic in excitatory neurons, astrocytes, microglia and oligodendrocytes (FDR adjusted  $P$ -value  $< 0.05$  and  $abs(\log_2FC) > 0.5$ ), gene ontology acquired from GREAT and examples of promoters and distal regions' cis-regulatory linked gene as in the panel of Figure ??e. **d**, Over-representation analysis (ORA) of DEGs (snRNA-seq) and DARs (snATAC-seq) from PiD and AD.

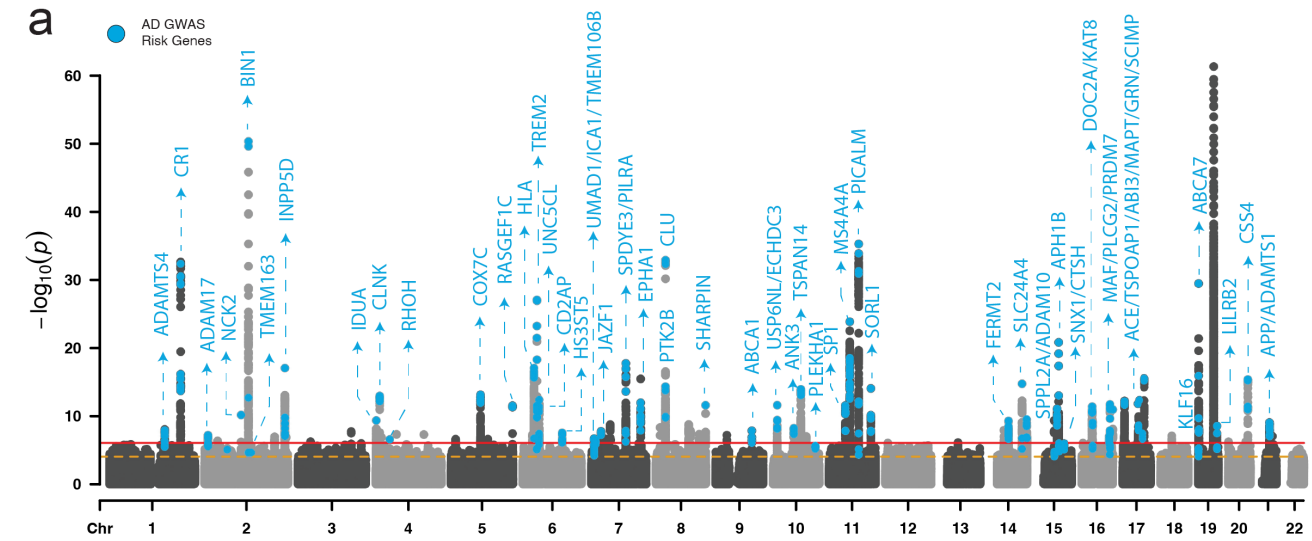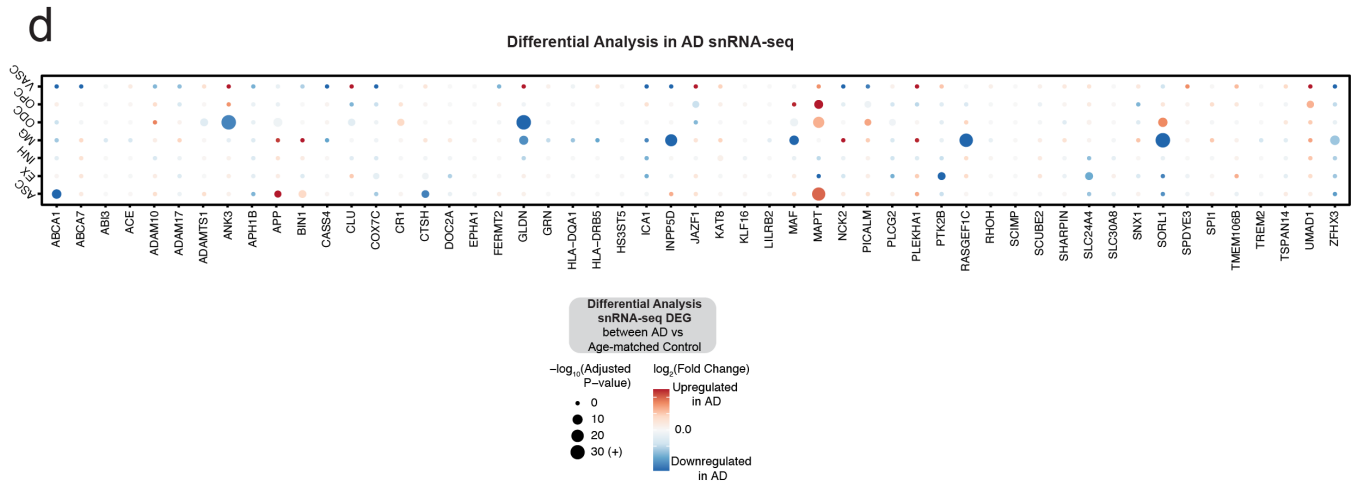

**Figure S3. Characterization of the genetic landscape of Alzheimer's disease and Frontotemporal dementia.** **a**, Manhattan plot of Alzheimer's disease<sup>2</sup>. **b**, The dotplot on the far right shows the snRNA-seq differentially expressed GWAS gene in each cell type between AD and age-matched control samples.

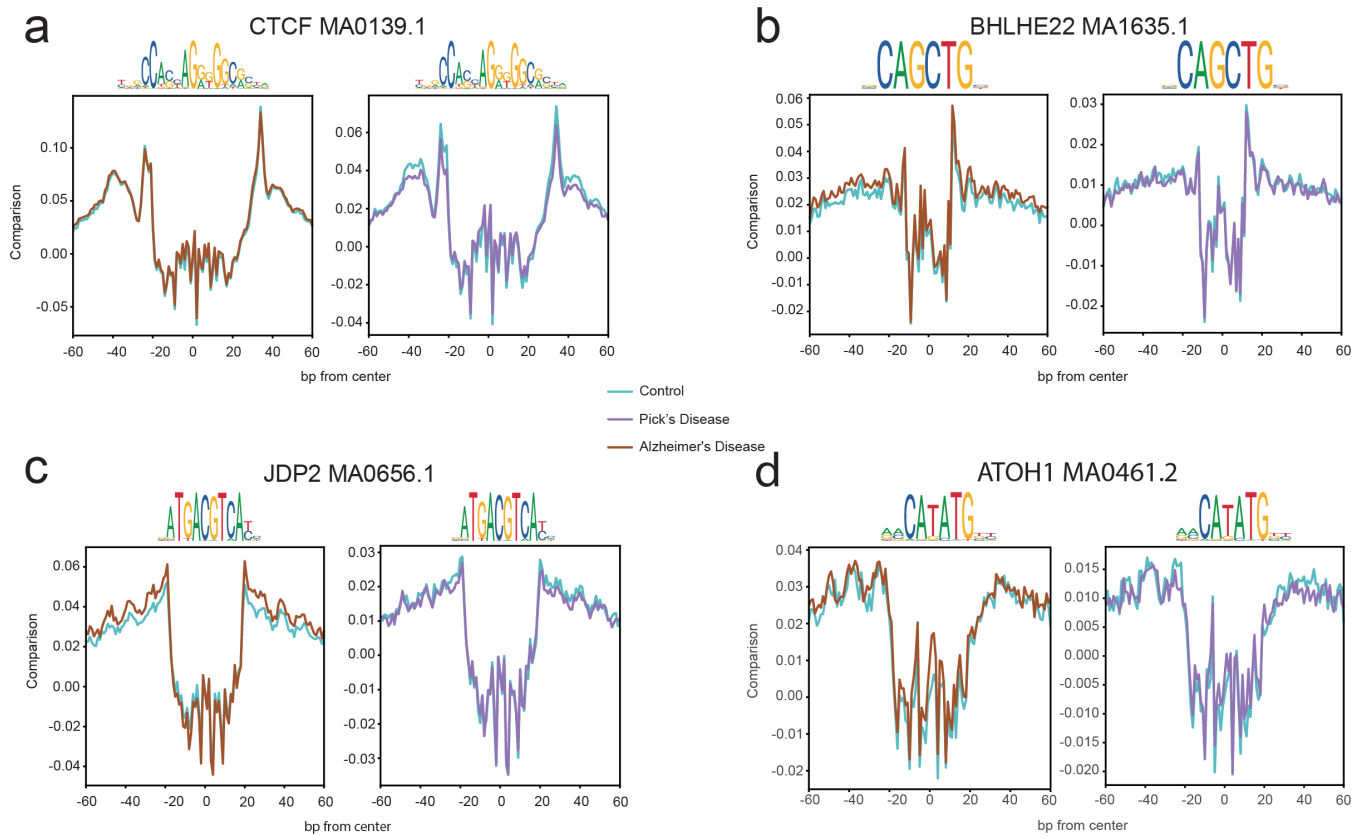

**Figure S4. Aggregated footprints of TFs in excitatory neurons. a,** Aggregated TF footprints of CTCF (MA0139.1) in AD and PiD. **b,** Aggregated TF footprints of BHLHE22 (MA1635.1) in AD and PiD. **c** Aggregated TF footprints of JDP2 (MA0656.1) in AD and PiD. **d** Aggregated TF footprints of ATOH1 (MA0461.1) in AD and PiD.

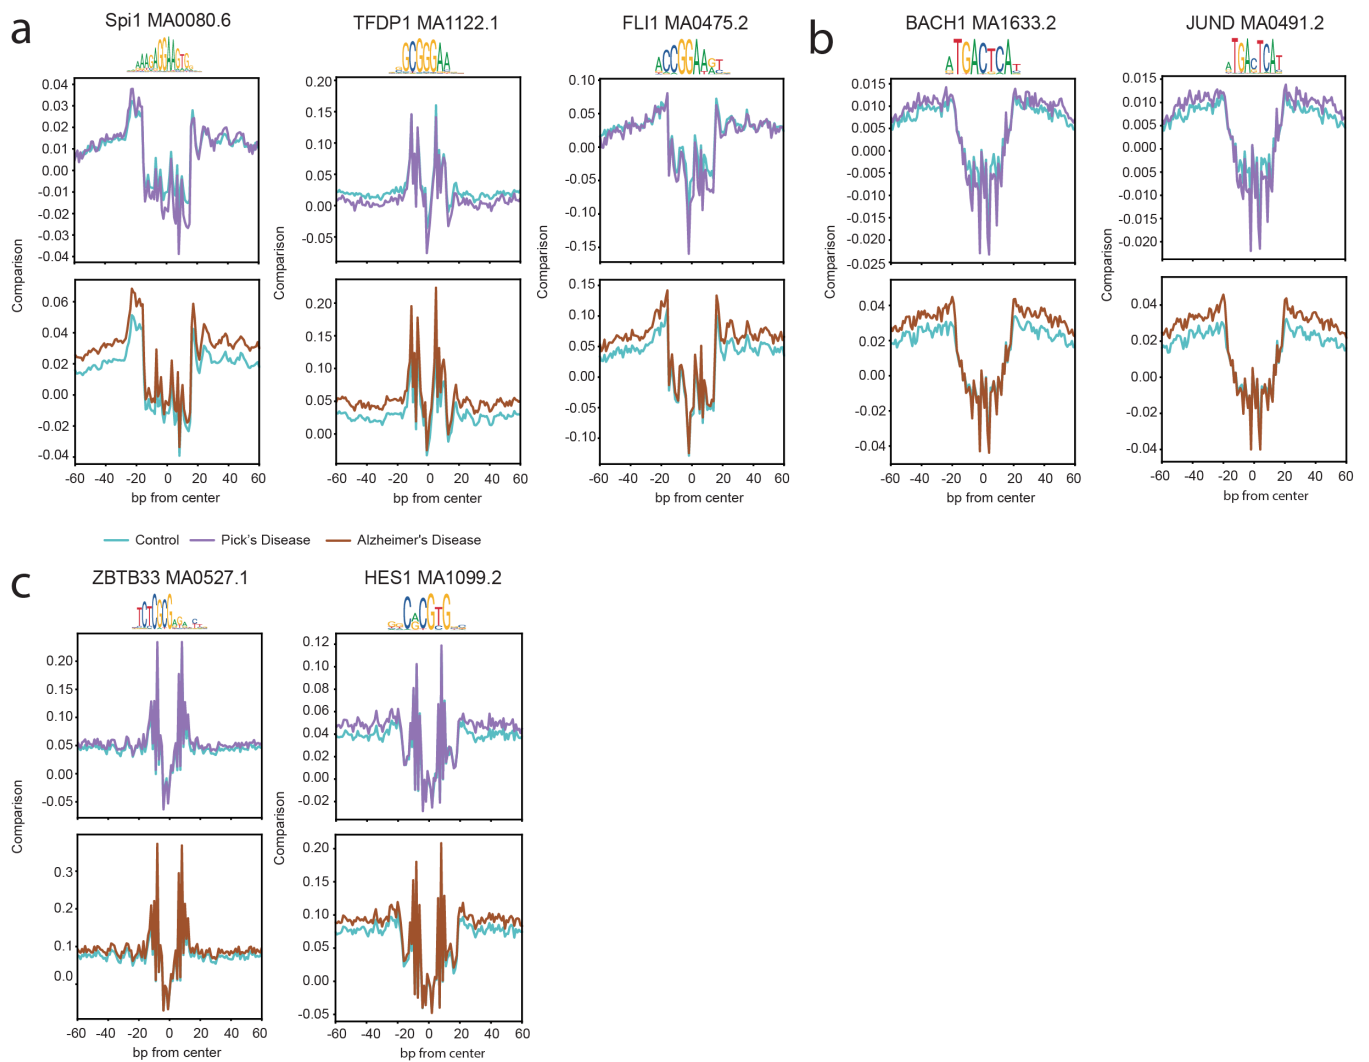

**Figure S5. Aggregated footprints of TFs in MG, AST, and ODC.** **a**, Aggregated TF footprints of Spi1 (MA0080.6), TFDP1 (MA1122.1) and FLI1 (MA0475.2) in PiD and AD. **b**, Aggregated TF footprints of BACH1 (MA1633.2) and JUND (MA0491.2) in PiD and AD. **c** Aggregated TF footprints of ZBTB33 (MA0527.1) and HES1 (MA1099.2) in PiD and AD.
